# Supplementary material
Source: MDPI journal article supplement (https://www.mdpi.com/2073-4352/11/1/49)
Supplement: s1 [file s1]

**Table S1.** Tracking the number of a Bragg peaks in the higher resolution shells for 3 different crystals. The average intensity of the peaks with in the highest resolution shell are compared between different frames within the time series of each crystal.

|                  | Frame No. | Resolution range, Å | No. peaks | Average Intensity |
|------------------|-----------|---------------------|-----------|-------------------|
| <b>Crystal 1</b> | 1         | 2.1 - 1.8           | 12        | 1210.47           |
|                  | 6         | 2.1 - 1.8           | 11        | 603.68            |
|                  | 10        | 2.1 - 1.8           | 7         | 548.02            |
|                  | 15        | 2.1 - 1.8           | 7         | 480.26            |
|                  | 18        | 2.1 - 1.8           | 7         | 450.7             |
| <b>Crystal 2</b> | 1         | 2.1 - 1.8           | 9         | 2020.12           |
|                  | 6         | 2.1 - 1.8           | 9         | 1837.31           |
|                  | 10        | 2.1 - 1.8           | 7         | 1490.68           |
|                  | 15        | 2.1 - 1.8           | 7         | 886.17            |
|                  | 20        | 2.1 - 1.8           | 6         | 867.03            |
|                  | 30        | 2.1 - 1.8           | 5         | 725.46            |
|                  | 42        | 2.1 - 1.8           | 4         | 671.75            |
| <b>Crystal 3</b> | 1         | 2.1 - 1.8           | 6         | 918.23            |
|                  | 6         | 2.1 - 1.8           | 5         | 855.098           |
|                  | 10        | 2.1 - 1.8           | 5         | 560.06            |
|                  | 15        | 2.1 - 1.8           | 5         | 555.04            |
|                  | 19        | 2.1 - 1.8           | 3         | 307.54            |

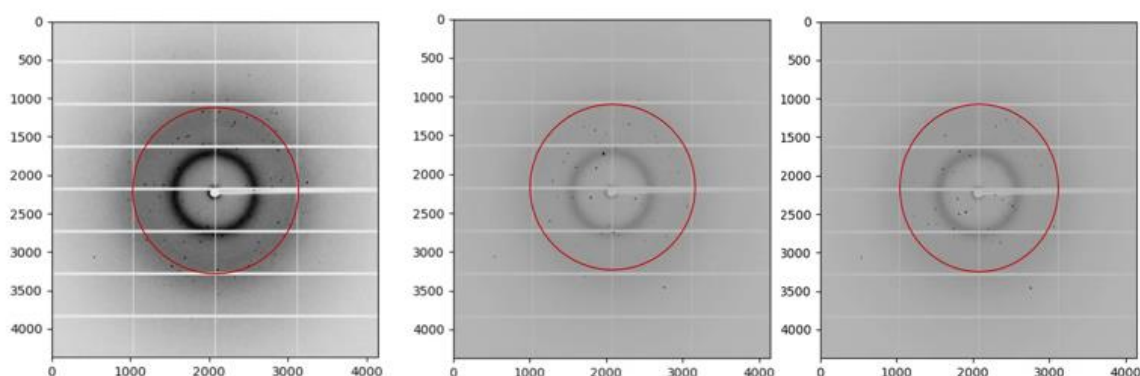

**Figure S1.** Diffraction images collected from Crystal 2 over a duration of 42 consecutive images. Three images are isolated from this series: A. Image 1, first image, B. Image 20, middle image and C. Image 42, last image in the series. The red ring indicates the diffraction limit of the data.

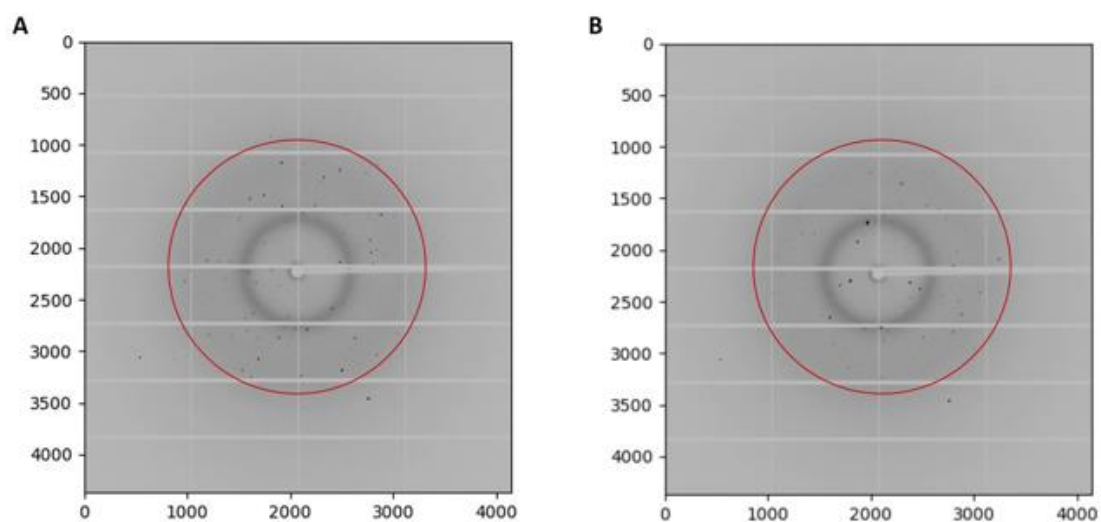

**Figure S2.** Diffraction images collected from Crystal 3 over a duration of 18 consecutive images. Two images were isolated from this series: A. Image 1, first image and B. Image 18, last image in the series. The red ring indicates the outer resolution limit of diffraction pattern.
